# Supplementary material for: Smoking Is Associated With Reduced Risk of Autoimmune Diabetes in Adults Contrasting With Increased Risk in Overweight Men With Type 2 Diabetes: A 22-year follow-up of the HUNT study
Source: PubMed Central journal article supplement — Diabetes Care. 2013 Feb 13;36(3):604–10. doi: 10.2337/dc12-0913 (PMC3579345; doi:10.2337/dc12-0913), 2013-02-13

SUPPLEMENTARY DATA

**Supplementary Table 1.** Baseline characteristics of study participants: results from HUNT study (1984-2008).

| Characteristics                   | individuals not reporting diabetes | Type 2 diabetes patients | Autoimmune diabetes patients |
|-----------------------------------|------------------------------------|--------------------------|------------------------------|
| No. of individuals (%)            | 88819 (97.93)                      | 1860 (2.05)              | 140 (0.2)                    |
| Age, mean, y (SD)                 | 50.2 (16.7)                        | 54.8 (10.7)              | 54.04 (11.28)                |
| % Men                             | 47.8                               | 51.7                     | 47.86                        |
| % Low education level             | 50.6                               | 60.8                     | 59.09                        |
| BMI, mean, kg/m <sup>2</sup> (SD) | 25.5 (3.8)                         | 29.8 (4.5)               | 29.17 (4.96)                 |
| % Overweight (25<BMI<30)          | 39.2                               | 45.7                     | 41.3                         |
| % Obese (BMI≥30)                  | 11.7                               | 42.6                     | 39.57                        |
| % Physical inactive               | 33.1                               | 37.5                     | 40.60                        |
| % alcohol abstainers              | 11.5                               | 13.9                     | 13.97                        |
| %With Family History of Diabetes  | 14.6                               | 41.0                     | 32.1                         |

**Supplementary Figure 1.** HR of type 2 diabetes in relation to the combination of BMI and smoking in men, results from HUNT 1984-2008

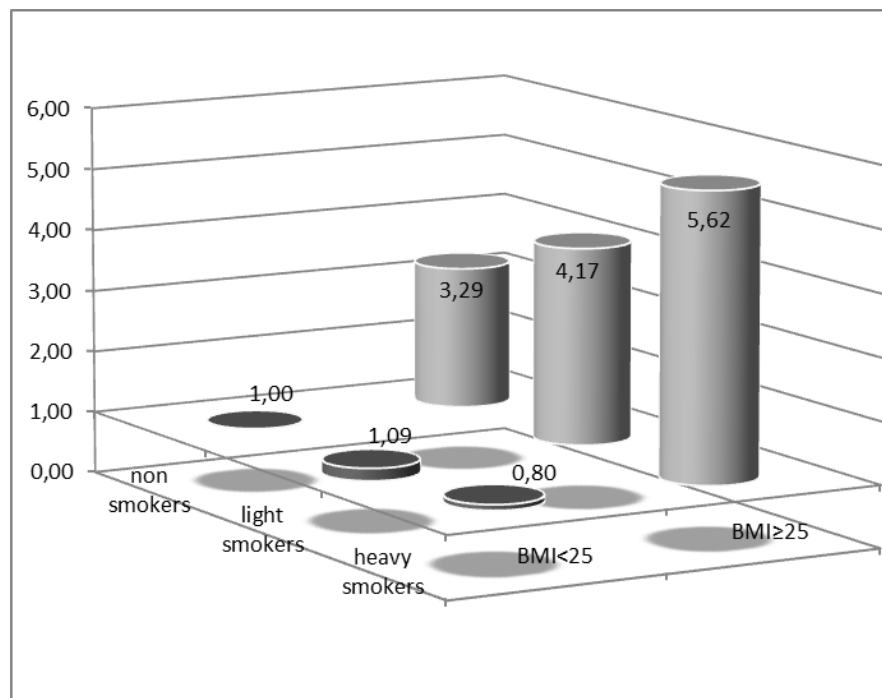

Supplement: supp_dc12-0913v120913_DC120913SupplementaryData.pdf [file supp_dc12-0913v120913_DC120913SupplementaryData.pdf]
